# Supplementary material for: An integrated analysis of differential miRNA and mRNA expressions in human gallstones
Source: Royal Society of Chemistry journal article supplement (doi:10.1039/c4mb00741g), 2015-01-21
Supplement: c4mb00741g1.pdf [file c4mb00741g1.pdf]

Table S1 Clinical information on the samples of the 12 patients highthrough-sequenced in this study.

| Characteristics         | Gallbladder stones | Gallbladder polyps | P value |
|-------------------------|--------------------|--------------------|---------|
| Sample Number           | 6                  | 6                  |         |
| Sex(male/female)        | 2/4                | 2/4                |         |
| Age(years)              | 41(26-58)          | 49.67(32-64)       | 0.798   |
| ALT(U/L)                | 30.27(15.80-44.70) | 33.43(22.40-44.70) | 0.667   |
| AST(U/L)                | 39.88(32.10-50.20) | 38.60(12.70-50.10) | 0.320   |
| BMI(kg/m <sup>2</sup> ) | 22.60(19.70-25.90) | 22.67(18.40-26.90) | 0.559   |

Table S2 characterization of mRNA data analysis

| Sample     | Length | Reads<br>number | Bases<br>number | Q20%  | Q30%  | GC%   | N(ppm) |
|------------|--------|-----------------|-----------------|-------|-------|-------|--------|
| Raw Data   |        |                 |                 |       |       |       |        |
| GS         | 51     | 15981246        | 815043546       | 98.69 | 96.91 | 50.76 | 30.36  |
| GP         | 51     | 15272975        | 778921725       | 98.54 | 96.56 | 53.49 | 31.03  |
| Clean Data |        |                 |                 |       |       |       |        |
| GS         | 50     | 13470672        | 673533600       | 99.57 | 98.4  | 48.98 | 21.76  |
| GP         | 50     | 12461011        | 623050550       | 99.55 | 98.27 | 51.65 | 22.17  |

GS, Gallbladder stones; GP, Gallbladder polyps.

Table S3 characterization of miRNA data analysis

| Sample     | Total reads | Total bases | Min length | Max length | Average length | Q20%  | Q30%  |
|------------|-------------|-------------|------------|------------|----------------|-------|-------|
| Raw Data   |             |             |            |            |                |       |       |
| GS         | 4452180     | 227061180   | 51         | 51         | 51             | 99.08 | 96.78 |
| GP         | 2908867     | 148352217   | 51         | 51         | 51             | 99.06 | 96.84 |
| Clean Data |             |             |            |            |                |       |       |
| GS         | 2215832     | 5033114     | 18         | 32         | 22.71          | 99.54 | 97.44 |
| GP         | 1424770     | 32308109    | 18         | 32         | 22.68          | 99.56 | 97.56 |

GS, Gallbladder stones; GP, Gallbladder polyps.

Table S4 microRNAs differentially expressed at the 0.05 FDR level.

| miRNA-ID        | logFC(GS/GP) | P-Value  |
|-----------------|--------------|----------|
| hsa-miR-194-3p  | 7.313351     | 0.000391 |
| hsa-miR-31-5p   | 2.931081     | 0.000871 |
| hsa-miR-141-5p  | 2.204408     | 0.009812 |
| hsa-miR-3934-5p | -6.22768     | 0.014079 |
| hsa-miR-1302    | -6.22768     | 0.014079 |
| hsa-miR-429     | 1.555024     | 0.021193 |
| hsa-miR-891a-5p | -6.0921      | 0.0219   |
| hsa-miR-141-3p  | 1.528212     | 0.022437 |
| hsa-miR-7641    | -1.52236     | 0.023862 |

|                 |          |          |
|-----------------|----------|----------|
| hsa-miR-210-3p  | 1.641284 | 0.026135 |
| hsa-miR-194-5p  | 1.422115 | 0.03287  |
| hsa-miR-146b-5p | -1.38148 | 0.037954 |
| hsa-miR-585-3p  | -1.8239  | 0.038112 |
| hsa-miR-133a-5p | -2.06098 | 0.042606 |
| hsa-miR-192-5p  | 1.340747 | 0.043696 |
| hsa-miR-200c-3p | 1.313953 | 0.048176 |
| hsa-miR-3910    | -2.55518 | 0.049336 |

---

GS, Gallbladder stones; GP, Gallbladder polyps.

Table S5 mRNAs differentially expressed at the 0.05 FDR thresholds. (XLS)

Table S6 Characteristics of the Novel miRNAs

---

| novel miRNA<br>id | total read count | consensus mature sequence |
|-------------------|------------------|---------------------------|
| Sample with GP    |                  |                           |
| chr1_2407         | 28               | uauggaggucucugucuggcu     |
| chr22_2692        | 30               | ucccuguccuccaggagcucacc   |
| chr16_1415        | 14               | agcaggacgguggccaug        |
| chr3_3401         | 62               | uguaaacaucuuugacug        |
| chr8_4459         | 241              | aucugugggauaugacug        |
| chr9_4615         | 64               | ccugucugagcgccgcuc        |

|            |    |                           |
|------------|----|---------------------------|
| chr4_3587  | 37 | ccgacgggcgugacccc         |
| chr5_3627  | 4  | uugcagcugccugggagugg      |
| chr8_4407  | 79 | aaggagcucacagucuauug      |
| chr20_2539 | 10 | gucccuguauucgaaagugaucgug |
| chr1_2159  | 10 | aaauugcacaacucucacauuc    |

---

Sample with GS

|            |     |                         |
|------------|-----|-------------------------|
| chr22_3126 | 47  | ucccuguccuccaggagcuca   |
| chr2_3453  | 17  | agugcuuggcugaggagcu     |
| chr16_1607 | 33  | agcaggacgguggccaug      |
| chr3_3991  | 83  | uguaaacauccuugacug      |
| chr8_5289  | 973 | aucugugggauuauugacug    |
| chr18_1997 | 13  | caggaguucugggcuguagc    |
| chr6_4700  | 18  | accuugccucucggcgcccc    |
| chr3_3824  | 33  | aggggcccaggagcgag       |
| chr2_3454  | 17  | agugcuuggcugaggagcu     |
| chr17_1815 | 9   | cggcgccgccccecccc       |
| chrX_6010  | 12  | augacagauugacauggacaauu |
| chr6_4764  | 148 | ggggauguagcucaguggu     |
| chr17_1816 | 9   | cggcgccgccccecccc       |
| chr1_2597  | 11  | ugaggcaguagauuguauu     |
| chr19_2180 | 9   | cccgcgccuccccgcc        |
| chr8_5215  | 134 | aaggagcucacagucuauug    |

|            |    |                          |
|------------|----|--------------------------|
| chr20_2960 | 21 | aaacucuggagcuuucguacaugc |
| chr7_5104  | 13 | uacucucucggacaagcuguaggu |
| chr10_158  | 10 | aggaaggugggggaugacgg     |
| chr19_2093 | 2  | gggguugggacaagaagagacu   |

---

GS, Gallbladder stones; GP, Gallbladder polyps.

Table S7 Enriched GO Ontology and KEGG pathways in differentially expressed genes in gallstones. (Tab-delimited table. Col1: GO/Pathway ID, Col2: Ontology Source, Col3: GOTerm name. The p-value cutoff for functional enrichment with the hypergeometric test was 0.05.) (XLS)

Table S8 Enriched GO Ontology and KEGG pathways in differentially expressed miRNAs in gallstones. (Tab-delimited table. Col1: GO/Pathway ID, Col2: Ontology Source, Col3: GOTerm name. The p-value cutoff for functional enrichment with the hypergeometric test was 0.05.) (XLS)

Table S9 Enriched GO Ontology and KEGG pathways in combining mRNA and miRNA data in gallstones. (XLS)

Table S10 RT-qPCR primers used in the validation assays.

---

| Gene Name | Sense primer sequecen   | Antisense primer sequence | Annealing |
|-----------|-------------------------|---------------------------|-----------|
| ATP11A    | CTGACCAGAGACAACCTGTCCG  | CGGCAGATTTCAGGAAGAGC      | 60°C      |
|           |                         | T                         |           |
| USP9Y     | GAGGTGGAAAGTTGTTTGCCTGG | TGCTCCATCTCTAAGAGGTGGC    | 59.2°C    |

|               |                         |                        |        |
|---------------|-------------------------|------------------------|--------|
| RPS4Y1        | GCCGTTTTGCTGTTACCCGCAT  | ATCTGGGTAGCGGATGGTTCGA | 59.8°C |
| TRDN          | GGAGGACAAAGAGAAAGCAGCTG | AGGTGGAATGGCTGGGCTTTGT | 60°C   |
| MYL3          | CAAGGACACAGGCACCTATGAG  | CTCCACTTCGTCTTCTGTCAGC | 59.5°C |
| AMH           | CGCTGCTTCACACGGATGACC   | GGTGGCGACTCCTCGAGTTCC  | 60°C   |
| IFI27         | CGTCCTCCATAGCAGCCAAGAT  | ACCCAATGGAGCCCAGGATGA  | 60°C   |
|               |                         | A                      |        |
| SLC28A2       | GGAGTCCAAGTTCAAGAGTGAGG | AGGCAATCAGGTTGGCTGCTAC | 60°C   |
| GAPDH         | TGACTTCAACAGCGACACCCA   | CACCCTGTTGCTGTAGCCAAA  | 60°C   |
| Hsa-miR-192   | GACCTATGAATTGACAGC      | GAACATGTCTGCGTATCTC    | 59.5°C |
| Hsa-miR-133a1 | TTTGGTCCCCTTCAACC       | GAACATGTCTGCGTATCTC    | 60°C   |
| Hsa-miR-210   | TGTGCGTGTGACAGCG        | GAACATGTCTGCGTATCTC    | 60°C   |
| Hsa-miR-200c  | GTCTTACCCAGCAGTGT       | GAACATGTCTGCGTATCTC    | 59.5°C |
| hsa-miR-194   | ACAGCAACTCCATGTGG       | GAACATGTCTGCGTATCTC    | 60°C   |
| hsa-miR-891a  | AACGAACCTGAGCCACT       | GAACATGTCTGCGTATCTC    | 60°C   |
| U6            | CTCGCTTCGGCAGCACA       | AACGCTTCACGAATTTGCGT   | 60°C   |

---
